# Complete assembly of *Escherichia coli* ST131 genomes using long reads demonstrates antibiotic resistance gene variation within diverse plasmid and chromosomal contexts

*Running title: Resolving ST131 genomes using GridION sequencing*

Arun Decano<sup>1</sup>, Catherine Ludden<sup>2,3</sup>, Theresa Feltwell<sup>3</sup>, Kim Judge<sup>2</sup>, Julian Parkhill<sup>2</sup>, Tim Downing<sup>1,#</sup>

<sup>1</sup> School of Biotechnology, Dublin City University, Dublin 9, Ireland;

<sup>2</sup> Wellcome Trust Sanger Institute, Hinxton, U.K.;

<sup>3</sup> London School of Hygiene & Tropical Medicine, U.K.

# Corresponding author: [tim.downing@dcu.ie](mailto:tim.downing@dcu.ie)

**ORCiDs:** 0000-0002-6058-6483 (A.D.); 0000-0001-9503-0744 (C.L.); 0000-0001-9623-3666 (T.F.); 0000-0002-1811-428X (K.J.); 0000-0002-7069-5958 (J.P.); 0000-0002-8385-6730 (T.D.).

## Author contributions:

Conceptualization - A.D. and T.D. Methodology - A.D., T.F., K.J. and T.D. Software - A.D. Formal Analysis - A.D. Investigation - A.D., C.L., T.F. and K.J. Resources - C.L., T.F., K.J., J.P and T.D. Writing - Original Draft - A.D., T.F. and T.D. Writing - Reviewing & Editing - A.D., C.L., T.F., K.J., J.P and T.D. Visualisation - A.D. Funding Acquisition - C.L., K.J. J.P. and T.D.

## Abstract

The incidence of infections caused by extraintestinal *Escherichia coli* (ExPEC) is rising globally, which is a major public health concern. ExPEC strains that are resistant to antimicrobials have been associated with excess mortality, prolonged hospital stays and higher healthcare costs. *E. coli* ST131 is a major ExPEC clonal group worldwide with variable plasmid composition, and has an array of genes enabling antimicrobial resistance (AMR). ST131 isolates frequently encode the AMR genes *bla*<sub>CTX-M-14/15/27</sub>, which are often rearranged, amplified and translocated by mobile genetic elements (MGEs). Short DNA reads do not fully resolve the architecture of repetitive elements on plasmids to allow MGE structures encoding *bla*<sub>CTX-M</sub> genes to be fully determined. Here, we performed long read sequencing to decipher the genome structures of six *E. coli* ST131 isolated from six patients. Most long read assemblies generated entire chromosomes and plasmids as single contigs, contrasting with more fragmented assemblies created with short reads alone. The long read assemblies highlighted diverse accessory genomes with *bla*<sub>CTX-M-15</sub>, *bla*<sub>CTX-M-14</sub> and *bla*<sub>CTX-M-27</sub> genes identified in three, one and one isolates, respectively. One sample had no *bla*<sub>CTX-M</sub> gene. Two samples had chromosomal *bla*<sub>CTX-M-14</sub> and *bla*<sub>CTX-M-15</sub> genes, and the latter was at three distinct locations, likely transposed by the adjacent MGEs: *ISEcp1*, *IS903B* and *Tn2*. This study showed that AMR genes exist in multiple different chromosomal and plasmid contexts even between closely-related isolates within a clonal group such as *E. coli* ST131.

## Importance

Drug-resistant bacteria are a major cause of illness worldwide and a specific subtype called *Escherichia coli* ST131 cause a significant amount of these infections. ST131 become resistant to treatment by modifying their DNA and by transferring genes among one another via large packages of genes called plasmids, like a game of pass-the-parcel. Tackling infections more effectively requires a better understanding of what plasmids are being exchanged and their exact contents. To achieve this, we applied new high-resolution DNA sequencing technology to six ST131 samples from infected patients and compared the output to an existing approach. A combination of methods shows that drug-resistance genes on plasmids are highly mobile because they can jump into ST131's chromosomes. We found that the plasmids are very elastic and undergo extensive rearrangements even in closely related samples. This application of DNA sequencing technologies illustrates at a new level the highly dynamic nature of ST131 genomes.

**Keywords:** Genome assembly, plasmid, MGE, antibiotic resistance, Nanopore, sequencing.

## Introduction

Reported cases of bloodstream and urinary tract infections caused by extraintestinal pathogenic *Escherichia coli* (ExPEC) are increasing globally at an alarming rate [1]. As a key source of ExPEC isolates worldwide, *E. coli* sequence type 131 (ST131) is regarded as a serious threat to public health, given its high level of antimicrobial resistance (AMR), as well as the broad spectrum of infections it causes in community and hospital settings [2,3].

*E. coli* ST131 is virulent [4] and has an expansive range of virulence factors [5,6], especially those linked to uropathogenic *E. coli* (UPEC) [3,7,8]. AMR and virulence genes allow ST131 to adapt to drug selection pressure and to survive in extraintestinal niches, and are often encoded on mobile genetic elements (MGEs) [9], which means the exact set of virulence and AMR genes in a single ST131 isolate may vary [8,10]. ST131 encodes a range of extended-spectrum  $\beta$ -lactamases (ESBLs) that hydrolyse third-line drugs including cephalosporins, the most common of which encode cefotaximase *bla*<sub>CTX-M-15</sub>. Within ST131, clade C2 has more AMR genes than other clades and is typically *bla*<sub>CTX-M-15</sub>-positive, differentiating it from clade C1 that can be *bla*<sub>CTX-M-14</sub> or *bla*<sub>CTX-M-27</sub>-positive [3,8].

Most ST131 AMR genes are reported to be encoded on plasmids: circular self-replicating double-stranded DNA molecules that constitute part of the bacterial accessory genome [11-13]. Plasmids can reduce bacterial cell fitness, but a number of post-segregation killing and stable plasmid inheritance mechanisms allow the stable maintenance of IncF plasmids in ST131 [14-16]. The chromosomal integration of plasmid genes is most commonly facilitated by transposons, which can ensure acquisition and conservation of such elements if there is no subsequent local recombination [17-18].

Identifying plasmid conjugation, recombination and transposition could have value in tracking AMR genes associated with disease outbreaks and antibiotic treatment failures. Plasmids may be classified using incompatibility (Inc), relaxase (MOB) and mating pair formation system typing [19], but difficulties in plasmid genetic analysis and reconstruction arise with short read data due to rearrangements driven by recombination, dense arrays of repetitive elements including transposable elements (TEs), changes in gene copy numbers, and high sequence variation. Methods using short reads alone may fail to detect genomic segments exchanged between plasmids and the chromosome, limiting evaluation of the core and accessory genomes.

Whole genome sequencing has provided a high resolution of the genomic epidemiology of ST131 and plasmid-mediated AMR outbreaks [20]. However, short reads alone are insufficient to resolve plasmids that often have numerous small MGEs of ~1 kb or less in size, e.g. TEs and insertion sequences (ISs) [21]. Complex transposable units (TUs) consisting of multiple TEs or ISs can mobilise AMR genes by transposition, and this can sometimes be followed by recombination within the TU between one of the inverted repeats (IRs) flanking the TE and the IR of another local TE or an adjacent homologous sequence, resulting in different TU structures, locations and copy numbers. At present, the exact resolution of complex structural rearrangements of repetitive TUs containing AMR genes may be impossible with short reads [22]. Consequently, plasmid assembly is a challenge requiring accurate long reads and sufficient coverage to distinguish between independent plasmids with regions of sequence identity [21,23].

Long reads, such as those generated using Oxford Nanopore Technologies (ONT) or Pacific Biosciences platforms can provide a solution to this plasmid assembly problem [24-26]. Here, we sequenced six ST131 using the ONT GridION X5 platform. Using the resulting high-coverage sequence data, we reconstructed and annotated the plasmids and chromosomal regions carrying *bla*<sub>CTX-M</sub> genes, as well as their genetic context and copy numbers.

## **Methods**

### **Sample collection**

Six ESBL-producing *E. coli* ST131 clinical strains were isolated in June–October 2015 from patients at Addenbrooke’s Hospital, Cambridge, as part of a study on longitudinal surveillance of antibiotic resistance in the hospital (Supplementary Table 1). Five samples were from faeces, and one was from blood. These were short-read sequenced in a multiplex run on an Illumina HiSeq 2500 platform and processed as previously outlined [27].

### **High molecular weight DNA extraction**

Frozen stocks of the six isolates were streaked onto LB agar plates and grown overnight at 37°C. Single colonies were subcultured onto LB agar plates and incubated overnight at 37°C. DNA was extracted using a Lucigen Masterpure Complete DNA and RNA Purification kit. For each sample, a swab was used to sweep half a plate of pure colonies, and suspended in 1x phosphate buffer solution (PBS). Samples were processed according to the manufacturer’s instructions, with elution in 70ul of Nuclease Free water. Pipetting was minimised to reduce shearing of the DNA prior to sequencing.

### **Oxford Nanopore library preparation and sequencing**

DNA was quantified using a Quant-iT™ HS (High Sensitivity) kit (Invitrogen). DNA purity was checked using a Nanodrop (ThermoFisher) and fragment size was confirmed by FEMTO Pulse (Nano Life Quest). The sequencing libraries were prepared using 1 µg DNA per sample and ligation sequencing kit 1D SQK-LSK109 with the barcoding extension kit EXP-NPB104 according to ONT protocols. The samples were combined using equimolar pooling and loaded onto a single 9.4.1 MIN-106 flow cell and sequenced on the GridION X5 platform under standard conditions.

### **Illumina library preparation and sequencing**

The short reads used in this study were created as follows: bacterial genomic DNA was extracted using the QIAextractor (Qiagen, Valencia, CA, USA) according to the manufacturer’s instructions. Library preparation was conducted according to the Illumina protocol and sequenced (96-plex) on an Illumina HiSeq 2500 platform (Illumina, San Diego, CA, USA) using 100 bp paired-end reads.

### **Oxford Nanopore base-calling and adapter trimming**

The resulting fast5 read files were transferred to a separate Linux server 4.4.0 (Ubuntu 16.04.4) for analysis. Basecalling was performed during the GridION run using ONT’s Guppy v0.5.1 and the resulting fast5 from the initial run was converted to fastq format with Albacore v2.0 (ONT). The statistical data of the sequencing run was processed with MinIONQC v1.3.5 [28] based on the default Q score cut-off of seven. Adapters and chimeric reads were removed from fastq files using Porechop v0.2.4 [29] with demultiplex settings (Supplementary Figure 1). Standard outputs were saved as log files and were then parsed. The quality of the final fastq files was assessed using FastQC v0.11.8 (<https://www.bioinformatics.babraham.ac.uk/projects/fastqc/>) and MultiQC v1.4 [30].

### **Genome assembly and improvement**

We assembled the genomes using the conservative, normal and bold modes of the long read-only assembly pipeline in Unicycler v4.6. Previous work has suggested that Unicycler outperforms alternatives [21] that struggle to resolve plasmids [31]. This workflow included the assembly polisher, Racon, which ran iteratively to minimise error rates of called bases [29]. For comparison, short read-only and hybrid assemblies were also created using Unicycler v4.6. Briefly, during short read-only assembly, Unicycler v4.6 employed SPAdes v3.12 to assemble short reads then used Pilon to polish the assembly. In hybrid assemblies, Unicycler v4.6 used Miniasm to piece long reads together first and

163 applied SPAdes v3.12 to incorporate short reads and bridge gaps. Pilon was run several times to  
164 achieve the most contiguous and completed genome assemblies.

165

166

## Genome assembly assessment and error rate quantification

167

168 The quality of resulting assemblies was assessed using Quast 3.0 [32] according to the total assembly  
169 length, number of contigs, N50, GC content and degree of replicon circularization. Assembly graphs  
170 were visualized with Bandage [33]. The resulting contigs in each assembly were classified as  
171 chromosomal or plasmid using machine learning algorithms implemented in mlplasmids [22].

172

173

## Read depth estimation

174

175 The read depth of each replicon was estimated by aligning the short Illumina and long Oxford  
176 Nanopore reads to the completed genomes using Smalt v0.7.6 and BWA-MEM v0.7.17 (with the flag  
177 `-x ont2d` for ONT reads), respectively. SAMtools v1.7 was used to process the SAM files to BAM  
178 format, remove duplicates, and identify the coverage at each base of each assembly. The median value  
179 for each replicon was noted and was normalized using the median chromosomal depth of the same  
180 assembly.

181

182

## Genome annotation

183

184 The genomes were annotated using Prokka v1.13.3 [34]. *Bla*<sub>CTX-M</sub> alleles and their contexts were  
185 detected using the Multiple Antibiotic Resistance Annotator (MARA) [35] and by aligning the  
186 assemblies against the Comprehensive Antibiotic Resistance Database (CARD v3.0). Information on  
187 the detected AMR features and MGEs are retrieved from Galileo AMR  
188 (<https://galileoamr.arcbio.com/mara/feature/list>). Plasmid identification and typing was carried out  
189 using PlasmidFinder v2.0 [36]. The plasmid-derived contigs from the assembled genomes were  
190 compared using BLAST v2.6.0 and their homology and annotation was visualised using EasyFig  
191 v2.2.2 [37].

192

193

## Phylogenetic analysis

194

195 To provide a phylogenetic context for these six isolates, the short Illumina reads of 63 from [8] and 56  
196 from [38] published ST131 short read libraries were cleaned and trimmed using Fastp v0.12.3 [39], as  
197 were the six isolates' short read libraries from this study. These 125 libraries were *de novo* assembled  
198 with Unicycler v4.6 using NCTC13441 as a reference and annotated using Prokka. The 126 genomes  
199 were processed using Roary v3.11.2 [40] with a 95% BLAST v2.6.0 identity threshold to create a core  
200 genome alignment containing 4,457 SNPs using MAFFT v7.310 [41] spanning 3,250,343 bases and  
201 3,350 genes of the NCTC13441 chromosome (a length similar to [20]). This core genome was used to  
202 construct a maximum likelihood phylogeny using RAxML v8.2.11 with the GTR model with gamma  
203 rate heterogeneity [42]. Clade classification of the six isolates was based on published ST131  
204 phylogenetic analysis [8] with associated classification and *bla*<sub>CTX-M</sub> allele data from [8] and [38].

205

206

207

## Results

208

209

### Oxford Nanopore long read quality control and filtering

210

211 High molecular weight DNA from six *E. coli* ST131 isolates was sequenced using long Oxford  
212 Nanopore reads and short Illumina reads to assemble their genomes allowing for plasmid  
213 reconstruction and resolution of AMR genes, MGEs and associated rearrangements. The ONT  
214 GridION X5 sequencing generated 8.9 Gbases in total across 1,406,087 reads (mean length of 6.3 Kb,  
215 Table 1). The number of reads generated per hour, total yield of bases over time, read length  
216 distribution, and read Q score distribution were examined (Supplementary Figure 2). Half of the bases  
217 with Q > 7 were on reads of 18 Kb or longer (Supplementary Figure 3). These metrics indicated  
218 sufficient GridION data in terms of quantity and quality. Initial screening removed reads with Q < 7,

219 leaving 1,142,067 reads with 8.2 Gbases with a mean Q score of 10.2 and a mean length of 7.2 Kb  
 220 (Table 1) for analysis. This included 81 reads longer than 100 Kb, including one of 155,312 bases.  
 221 This corresponded to 257-fold theoretical coverage for six 5.3 Mb genomes.

222  
 223

| Parameter          | All reads | Reads with Q <sub>7</sub> |
|--------------------|-----------|---------------------------|
| Total bases        | 8,908,946 | 8,193,921                 |
| Total reads        | 1,406,087 | 1,142,067                 |
| Mean length (bp)   | 6,336     | 7,175                     |
| Median length (bp) | 2,273     | 2,897                     |
| Mean Q score       | 9.1       | 10.2                      |
| Median Q score     | 10.0      | 10.5                      |
| Reads >100 Kb      | 85        | 81                        |

**Table 1.** Quality parameters indicated high-quality read libraries for the six ST131 samples from GridION X5 sequence data. A total of 264,020 of low-quality reads (with Q<7) totalling 715,024,800 bases were excluded.

233  
 234  
 235  
 236  
 237  
 238  
 239  
 240  
 241

The initial number of reads per library ranged from 127,118 to 510,253 and these were filtered using a series of steps to ensure that the reads used for each of the six assemblies had high quality. Bases were successfully called at an average of 97.9% of reads (Table 2). Identifying the consensus demultiplexed, duplicate-free and adapter-free reads from Porechop v0.2.4 eliminated a further 2.9% of the basecalled reads, yielding 120,123 to 487,482 reads per library (Table 2).

| Strain   | Initial reads (fast5) | Basecalled (fastq) | Adapter-free (fastq) | Average length (bp) |
|----------|-----------------------|--------------------|----------------------|---------------------|
| VRES1160 | 358,829               | 351,636            | 345,033              | 7,037               |
| VREC0693 | 208,478               | 204,904            | 194,413              | 8,982               |
| VRES0739 | 163,349               | 160,693            | 155,900              | 9,171               |
| VREC1013 | 510,253               | 497,646            | 487,482              | 6,657               |
| VREC1073 | 313,627               | 304,218            | 298,658              | 7,256               |
| VREC1428 | 127,118               | 124,539            | 120,123              | 9,301               |

242 **Table 2.** Number of reads generated from GridION X5 sequencing data per library that passed filtering  
 243 during basecalling with Albacore v2.0 and those that were adapter-free (using Porechop v0.2.4). The  
 244 latter totalling 1,601,609 reads were used for downstream analyses. 80,045 reads were excluded during  
 245 basecalling or adapter-trimming.

246

### 247 Long read genome assembly illuminates highly diverse accessory genomes

248

249 All six genome assemblies produced chromosomes of 4.81-5.38 Mb with differing numbers of  
 250 plasmids with lengths spanning 4-156 Kb (Supplementary Figure 4; Table 3). The numbers of contigs  
 251 produced by long read assemblies of three samples (VREC0693, VRES0739, VREC1073)  
 252 corresponded exactly to the chromosome and plasmids. The other three isolates had either one  
 253 (VRES1160 and VREC1013) or two (VREC1428) additional chromosomal contigs (Supplementary  
 254 Table 2).

255

256 Contigs were classified as chromosomal or plasmid-derived using mPlasmids given a probability  
 257 threshold of 60% [22], with further screening for plasmid-related gene content using MARA, CARD  
 258 and PlasmidFinder (Supplementary Table 2). The largest plasmid was a 156.3 Kb IncFIA one in  
 259 VREC1073, its sole plasmid. VREC1428 and VRES1160 had 92.8 and 61.9 Kb IncFIA plasmids,  
 260 respectively, along with three small Col plasmids each (Table 3). VREC0693 had a 132.0 Kb IncFIB  
 261 plasmid and an 88.8 Kb IncB plasmid - IncB plasmids have the same Rep domains as IncFII plasmids  
 262 [42]. VREC3013 had one 89.9 Kb IncFII plasmid. VRES0739 alone had no large plasmid, which was  
 263 verified with the short read data.

264

265 By mapping the long reads to the optimal assemblies, the read coverage of each chromosome and  
 266 plasmid was estimated (Supplementary Table 2). Each chromosome had between 126- and 310-fold

267 median coverage, and the median coverage levels of large plasmids ranged from 85- to 282-fold,  
 268 except for VREC1013's IncFII plasmid that had 1,015-fold coverage and a normalized depth of 3.3-  
 269 fold. The normalised depth of plasmids compared to chromosomes suggested some cells in VREC1428  
 270 and VREC1073 may have lost their IncFIA plasmid, and the same for VREC0693 and its IncFIB  
 271 plasmid. However, the IncFIA plasmid in VRES1160 and the IncB plasmid in VREC0693 had higher  
 272 than expected copy numbers (by 9% after normalisation), potentially indicating stable plasmid  
 273 retention.

274  
 275

| Strain   | Genome length (bp) | Number of contigs |                  | N50       | Chromosome size (Mb) | Number of plasmids | Plasmid sizes (Kb) |
|----------|--------------------|-------------------|------------------|-----------|----------------------|--------------------|--------------------|
|          |                    | Assembled         | Minimum possible |           |                      |                    |                    |
| VRES1160 | 5,326,801          | 6                 | 5                | 5,126,679 | 5.23                 | 4                  | 62, 16, 5, 4       |
| VREC0693 | 5,260,741          | 3                 | 3                | 5,039,909 | 5.04                 | 2                  | 132, 89            |
| VRES0739 | 4,806,912          | 3                 | 3                | 4,797,749 | 4.81                 | 2                  | 5, 4               |
| VREC1013 | 5,223,433          | 3                 | 2                | 3,699,451 | 5.14                 | 1                  | 90                 |
| VREC1073 | 5,539,158          | 2                 | 2                | 5,286,804 | 5.38                 | 1                  | 156                |
| VREC1428 | 5,236,419          | 7                 | 5                | 4,924,536 | 5.13                 | 4                  | 92, 5, 5, 4        |

276 **Table 3.** Total size of assemblies, chromosomes and plasmids found in each strain based on their  
 277 optimal whole genome assemblies using the GridION X5 long reads. Each assembly had seven or less  
 278 contigs, and in three cases no fewer contigs were possible, consistent with full genome assembly (for  
 279 VREC0693, VRES0739 and VREC1073). The optimal assembly with Unicycler used long reads alone  
 280 (in bold mode), with exception of VREC1013, where a hybrid combining short Illumina reads with  
 281 long Oxford Nanopore reads was best, with minor manual screening (Supplementary Results).

282  
 283

284 Across five assemblies in the Unicycler normal mode, the median indel error rates for short reads and  
 285 hybrid assemblies were similar (0.21 and 0.28 per 100 Kb, respectively), but was much higher for long  
 286 read assemblies (265.0 per 100 Kb, Supplementary Table 3). Likewise, the median mismatch error  
 287 rates for short reads and hybrid assemblies were comparable (4.25 and 2.28 per 100 Kb, respectively),  
 288 but was much higher for long read assemblies (332.8 per 100 Kb, Supplementary Table 3). These rates  
 289 excluded VREC1073, for which some Quast metrics were zero values.

290  
 291

### 292 **The dynamic locations and genomic contexts of *bla*<sub>CTX-M</sub> genes in long read assemblies**

293  
 294

293 The optimised assemblies provided an improved view of the genomic context of each *bla*<sub>CTX-M</sub> allele,  
 294 whose effectiveness as a marker for ST131 clade classification and origin [8] we explored here. The  
 295 deeper resolution of genome architecture revealed surprising differences in *bla*<sub>CTX-M</sub> gene context  
 296 (Figure 1; Supplementary Table 2), including the discovery of chromosomal *bla*<sub>CTX-M</sub> genes in  
 297 VREC0693 (three copies of *bla*<sub>CTX-M-15</sub>) and VREC1073 (one copy of *bla*<sub>CTX-M-14</sub>). All *bla*<sub>CTX-M</sub> genes  
 298 were complete (876 bp) with adjacent *ISEcp1* (1,658 bp with flanking IRs of 14-16 bp) and Tn2 (5.8  
 299 Kb) elements: *ISEcp1* and Tn2 can transpose *bla*<sub>CTX-M</sub> and other ESBL genes [44-45]. The VRES0739  
 300 genome did not contain any region homologous to *bla*<sub>CTX-M</sub>, most likely because it had lost an IncF  
 301 plasmid, unlike the other isolates.

302  
 303

303 VRES1160, VREC0693 and VREC1013 all had *bla*<sub>CTX-M-15</sub> genes linked to isoforms of *ISEcp1*, IS26  
 304 and Tn2, implicating them in driving transposition of the TU (Supplementary Figure 5). Each was  
 305 similar to the ST131 clade C2 *ISEcp1-bla*<sub>CTX-M-15-orf477Δ</sub> TU [8,46] but with distinct structural  
 306 differences. VRES1160's single *bla*<sub>CTX-M-15</sub> gene was at 2,296 bp on its IncFIA plasmid and was  
 307 flanked by *ISEcp1* to its 5' and Tn2 followed by IS26 at its 3' end, with another Tn2 5' of *ISEcp1*.  
 308 VREC0693's three chromosomal *bla*<sub>CTX-M-15</sub> genes were not tandem repeats (chromosomal locations  
 309 2,781,074, 3,696,068 and 3,970,927), but each of these TUs were identical: all had *ISEcp1* at the 5'  
 310 ends and truncated Tn2s at the 3' ends. VREC1013's sole *bla*<sub>CTX-M-15</sub> gene was located at 13,226 bp on

311 its IncFII plasmid and was flanked by a truncated *ISEcp1* at its 5' end and Tn2 at its 3' end, with IS26  
312 copies 5' and 3' of these segments.

313  
314 VREC1428's single *bla*<sub>CTX-M-27</sub> gene was on its IncFIA plasmid at position 6,018, and VREC1073's  
315 single chromosomal *bla*<sub>CTX-M-14</sub> gene was at contig position 19,746 (Supplementary Figure 5). Both  
316 their *bla*<sub>CTX-M</sub> genes were flanked by a truncated *ISEcp1* at the 5' ends and a shortened *IS903B* at the  
317 3' ends suggesting that *ISEcp1* and *IS903B* may have facilitated the transposition of the TU from the  
318 plasmid. Similar *bla*<sub>CTX-M</sub> gene transposition events have been observed in ST131 clade C1 [8].  
319

320 Alignment of the plasmid-derived contigs of VRES1160 (IncFIA) to VREC1013 (IncFIB) showed that  
321 the *bla*<sub>CTX-M-15</sub>-positive plasmids were much more similar (>83% identity) relative to VREC1428's  
322 *bla*<sub>CTX-M-27</sub>-positive IncFIA plasmid, which was more distinct (Figure 2). This suggested that the  
323 plasmid homology corresponded well with VRES1160 and VREC1013 *bla*<sub>CTX-M</sub> gene and subclade  
324 classification, but not IncF replicon type.  
325

### 326 **Phylogenetic context of analysed isolates**

327  
328 Comparison of these six samples with 119 published ST131 [8,38] as short read assemblies scaffolded  
329 using reference genome NCTC13441 showed that all clustered in ST131 clade C (Supplementary  
330 Figure 6). There was sufficient resolution across 4,457 core genome SNPs to confidently assign them  
331 to subclades C1 (n=1) or C2 (n=5) (Figure 3). VRES1160, VREC0693, VREC1013, VRES0739 and  
332 VREC1073 clustered with C2, whereas the *bla*<sub>CTX-M-27</sub>-positive VREC1428 was in C1. VRES1160,  
333 VREC0693 and VREC1013 all had IncF plasmids (IncFIA, IncFIB, IncFII) and *bla*<sub>CTX-M-15</sub> genes,  
334 consistent with C2 are typically *bla*<sub>CTX-M-15</sub>-positive, which was observed for 77% of C2 isolates here  
335 (48 out of 62). However, VREC1073 was in C2 but had an IncFIA plasmid with a *bla*<sub>CTX-M-14</sub> gene,  
336 contradicting this pattern and was the sole *bla*<sub>CTX-M-14</sub>-positive C2 isolate found here. The core  
337 genomes of VRES0739 and VREC0693 were identical, implying that VRES0739 has very recently  
338 lost its (*bla*<sub>CTX-M</sub>-positive IncF) plasmid. The sole isolate clustering with C1 was VREC1428, which  
339 had an IncFIA plasmid with a *bla*<sub>CTX-M-27</sub> gene, and so may belong to the emerging subclade C1-M27  
340 as evidenced by the presence of prophage-like regions like M27PP1/2 [38].  
341  
342

### 343 **Discussion**

344  
345 Our study resolved the plasmid architecture of several recent *E. coli* ST131 isolates, allowing  
346 investigation of AMR gene location, copy number and potential transposon-driven rearrangements.  
347 This advance was facilitated by the careful DNA handling during extraction to produce large volumes  
348 of high molecular weight DNA that was pure and free from contamination, which was avoided by  
349 performing separate extraction steps to obtain small plasmids [47] overcoming a limitation for  
350 MinION sequencing [21].  
351

352 The long read genome assemblies illuminated significant variation in plasmids, MGEs and *bla*<sub>CTX-M</sub>  
353 gene composition that was not captured by short reads. ST131 is a globally pandemic *E. coli* clonal  
354 group [15] with diverse sources of transmission [25]. Phylogenetic comparison with published  
355 genomes [8,42] showed that five out of six isolates were from subclade C2 with one from C1. The  
356 emergence of clade C has been associated with IncF plasmids, and clade C2 with *ISEcp1* and Tn2  
357 elements flanking *bla*<sub>CTX-M-15</sub> genes [47-48]. Our long read assemblies showed the excision of the  
358 entire TU from the IncFIB plasmid and chromosomal integration at three distinct locations for  
359 VREC0693, and similarly chromosomal translocation of the *bla*<sub>CTX-M-14</sub> gene from an IncFIA plasmid  
360 for VREC1073, mediated by *ISEcp1* and *IS903B* based on previous work [8]. These transposition  
361 events were likely driven by recombination at adjacent transposable elements. This highlights the  
362 value of long read sequencing to resolve the location of *bla*<sub>CTX-M</sub> genes and that chromosomal  
363 translocations are not rare in ST131.  
364

365 A high resolution of the AMR gene structure, context and copy number is highly predictive of AMR  
366 phenotypes [45], and could lead to new insights into AMR mechanisms. However, the high indel and

367 mismatch errors in long Oxford Nanopore reads [31,47,51-52] limits power to identify AMR isoforms  
368 that could permit genome-based antimicrobial susceptibility testing [43,53-54]. Here, the five ONT  
369 assemblies together had an average of 447-fold higher indel and 48-fold higher mismatch error rates  
370 than those for the corresponding Illumina reads, similar to previous work with MinION reads [23].  
371 Consequently, short reads and assembly polishing methods remain important for SNP identification  
372 and error detection until long read error rates can be reduced [55].

373  
374 Our findings illustrate the diversity of AMR gene context even within recently emerged clones such as  
375 ExPEC ST131. Further studies are needed with larger sample sizes to identify the rates and  
376 mechanisms of these dynamic changes.

377

378

### 379 **Data Summary**

380 1. Illumina reads accession numbers: ERR2138475, ERR2138200, ERR2138591, ERR1878196,  
381 ERR2137889 and ERR1878359 in the European Nucleotide Archive (ENA) under BioProjects  
382 PRJEB21499 and PRJEB19918.

383 2. ONT reads ENA accession numbers: [www.ebi.ac.uk/ena/data/view/PRJXXXXXX](http://www.ebi.ac.uk/ena/data/view/PRJXXXXXX), Figshare  
384 <https://doi.org/10.6084/m9.figshare.7554293.v1>

385 3. Unicycler assemblies, Figshare <https://doi.org/10.6084/m9.figshare.7560458.v2>

386

### 387 **Ethical approval**

388 The study protocol was approved by the National Research Ethics Service (ref:14/EE/1123), and the  
389 Cambridge University Hospitals NHS Foundation Trust Research and Development Department (ref:  
390 A093285).

391

### 392 **Acknowledgements**

393 We acknowledge Anne Parle-McDermott and Emma Finlay at Dublin City University (DCU, Ireland)  
394 for guidance on DNA extraction protocols, and also Emma Betteridge, Karen Oliver and the Long  
395 Read sequencing and data teams at the Wellcome Sanger Institute (U.K.) for their assistance with  
396 sequencing.

397

### 398 **Conflicts of interest**

399 JP is a consultant to Next Gen Diagnostics Llc.

400

### 401 **Funding information**

402 This project was funded by a Dublin City University (DCU) O'Hare Ph.D. Fellowship, a DCU  
403 Enhancing Performance grant, a DCU Orla Benson Memorial Scholarship grant, a DCU Advanced  
404 Research Computing Centre for Complex Systems Modelling (ARC-SYM) grant, and by the Health  
405 Innovation Challenge Fund (WT098600, HICF-T5-342), a parallel funding partnership between the  
406 Department of Health and Wellcome Trust. The views expressed in this publication are those of the  
407 author(s) and not necessarily those of the Department of Health or Wellcome Trust. Catherine Ludden  
408 is a Wellcome Trust Sir Henry Wellcome Postdoctoral Fellow (110243/Z/15/Z).

409



410 **Figure legends**

411

412 Figure 1. Two of the ST131's *bla*<sub>CTX-M</sub> genes were on chromosomal contigs (VREC0693 and  
 413 VREC1073). VRES1160 and VREC1013 had IncFIA and IncFII plasmids, respectively, both of which  
 414 had *bla*<sub>CTX-M-15</sub> genes. VREC1428 had an IncFIA plasmid with *bla*<sub>CTX-M-14</sub> gene. VRES0739 is not  
 415 shown because it was *bla*<sub>CTX-M</sub>-negative and had no large plasmid. The contigs were classified as  
 416 chromosomal or plasmid-derived by mPlasmids so that the *bla*<sub>CTX-M</sub> genes and their genetic flanking  
 417 context could be examined. Annotation was derived from Galileo™ AMR based on the Multiple  
 418 Antibiotic Resistance Annotator (MARA) and database. The *bla*<sub>CTX-M</sub> variants are labelled and  
 419 encircled in red (*bla*<sub>CTX-M-15</sub>), purple (*bla*<sub>CTX-M-14</sub>) or green (*bla*<sub>CTX-M-27</sub>).  
 420

Strain, subclade,  
 contig size (bp) &  
*bla*<sub>CTX-M</sub> gene location

**Annotated genetic structure of contig with *bla*<sub>CTX-M</sub> genes**

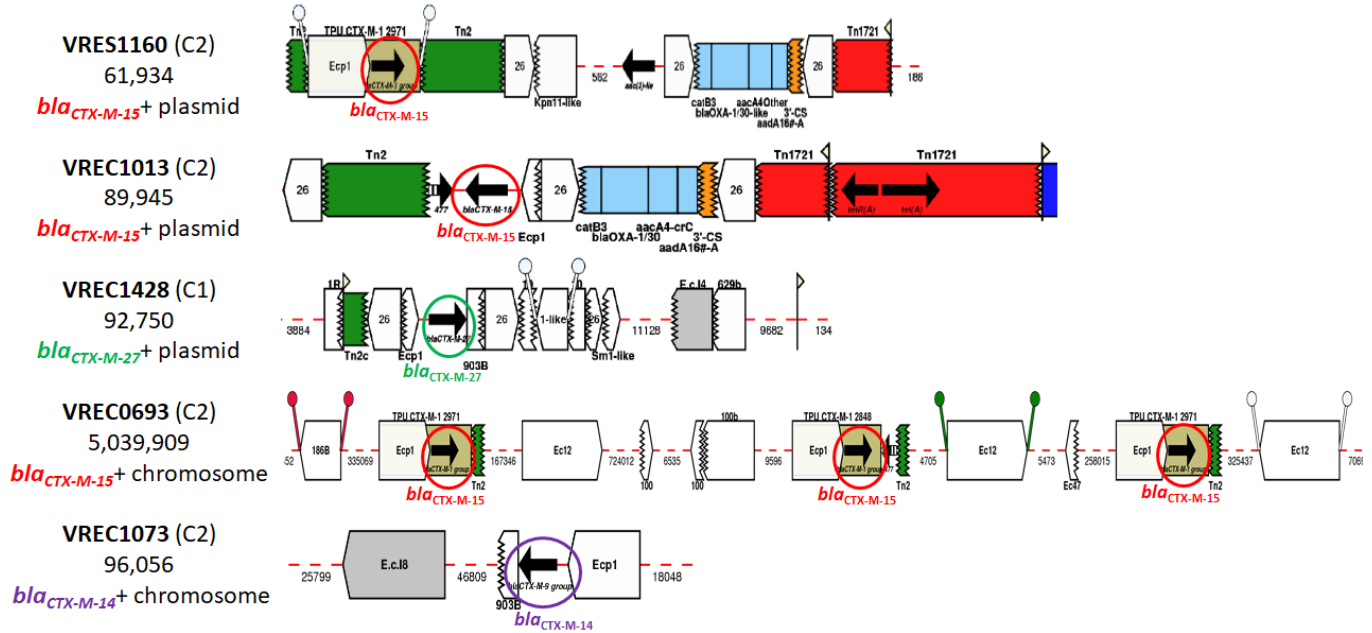

421

422 Figure 2. Pairwise comparisons of the three *bla*<sub>CTX-M</sub>-positive plasmid-associated contigs showed high  
 423 homology for the two from subclade C2 (VREC1013 and VRES1160) relative to one from C1  
 424 (VREC1428, top). BLAST alignment homology was visualised with EasyFig v2.2.2 such that the  
 425 middle blocks connecting regions of the contigs represent nucleotide homology: blue for homologous  
 426 regions in the same direction, and yellow for inversions. Gaps or white spaces denote unique loci or  
 427 regions present in a contig but not in the other. Gene models are in green with the direction of  
 428 transcription shown by arrows. Genes of interest are labelled above each arrow. The *bla*<sub>CTX-M-27</sub> grey  
 429 (top) is in mauve and the two *bla*<sub>CTX-M-15</sub> genes (middle, bottom) are in red. The table below shows the  
 430 contig size, plasmid type and the number of genes per strain. Products of the annotated genes are in  
 431 Supplementary Table 4.  
 432

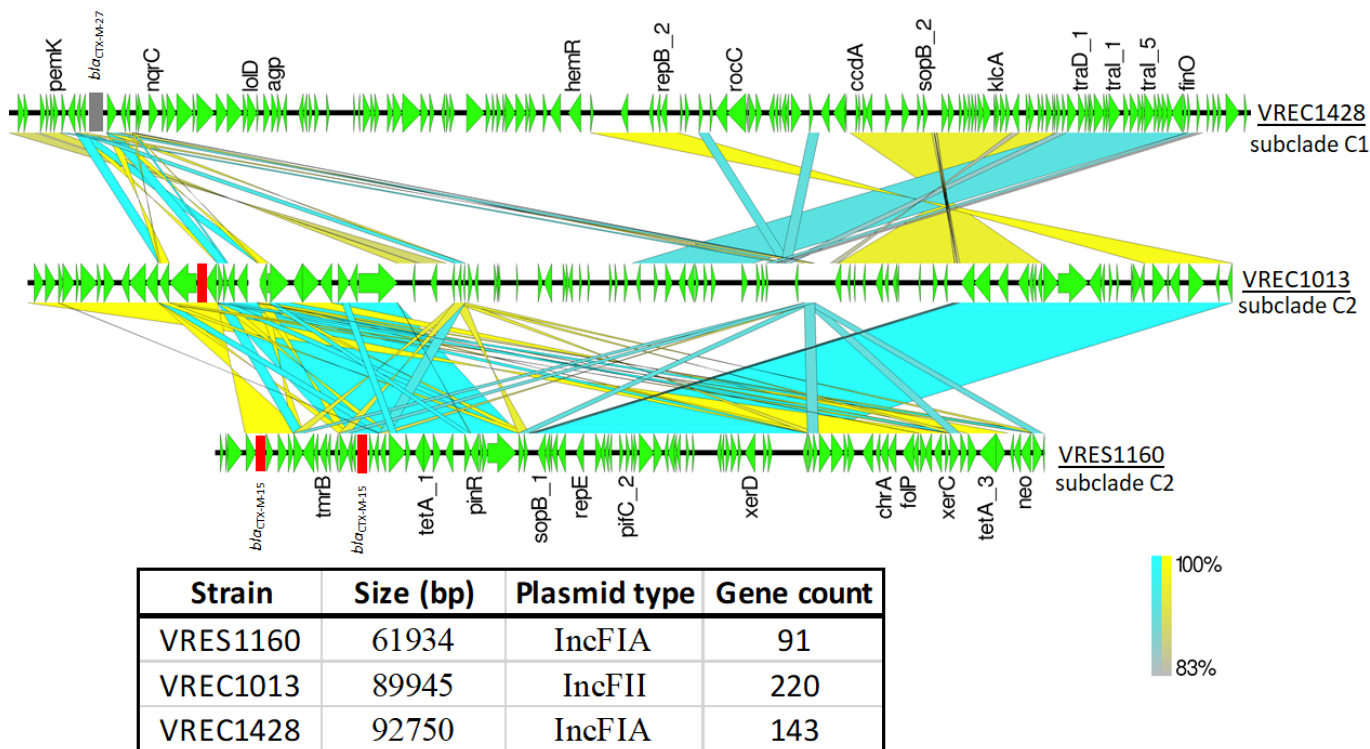

433

434 Figure 3. The phylogenetic context of the six ST131 genomes (names are in large bold font) showed  
 435 that all except VREC1428 were in ST131 subclade C2 (red inner ring: VRES1160, VREC1073,  
 436 VRES0739, VREC0693 and VREC1013). VREC1428 clustered in subclade C1 (purple inner ring). No  
 437 new isolate clustered in C0 (green inner ring), B (blue inner ring) or an intermediate cluster (grey inner  
 438 ring). Clade classification was based on phylogenetic analysis by [8] by including the reference  
 439 NCTC13441, n=63 isolates from [8] and n=56 from [38] with associated classification and *bla*<sub>CTX-M</sub>  
 440 allele data. VREC1073, and VREC0693 had chromosomal *bla*<sub>CTX-M</sub> genes. The outer ring shows  
 441 *bla*<sub>CTX-M-15</sub> (red), *bla*<sub>CTX-M-14</sub> (purple) and *bla*<sub>CTX-M-27</sub> alleles (green). The phylogeny was built with  
 442 RAxML v8.2.11 using 4,457 SNPs from a core genome alignment generated with Roary v3.11.2 and  
 443 was visualised with iTOL v4.3. Branch support was performed by 100 bootstrap replicates, and the  
 444 scale bar indicates the number of substitutions per site. This mid-pointed rooted phylogeny includes  
 445 reference genome isolates EC958 and NCTC13441 (both in C2).  
 446

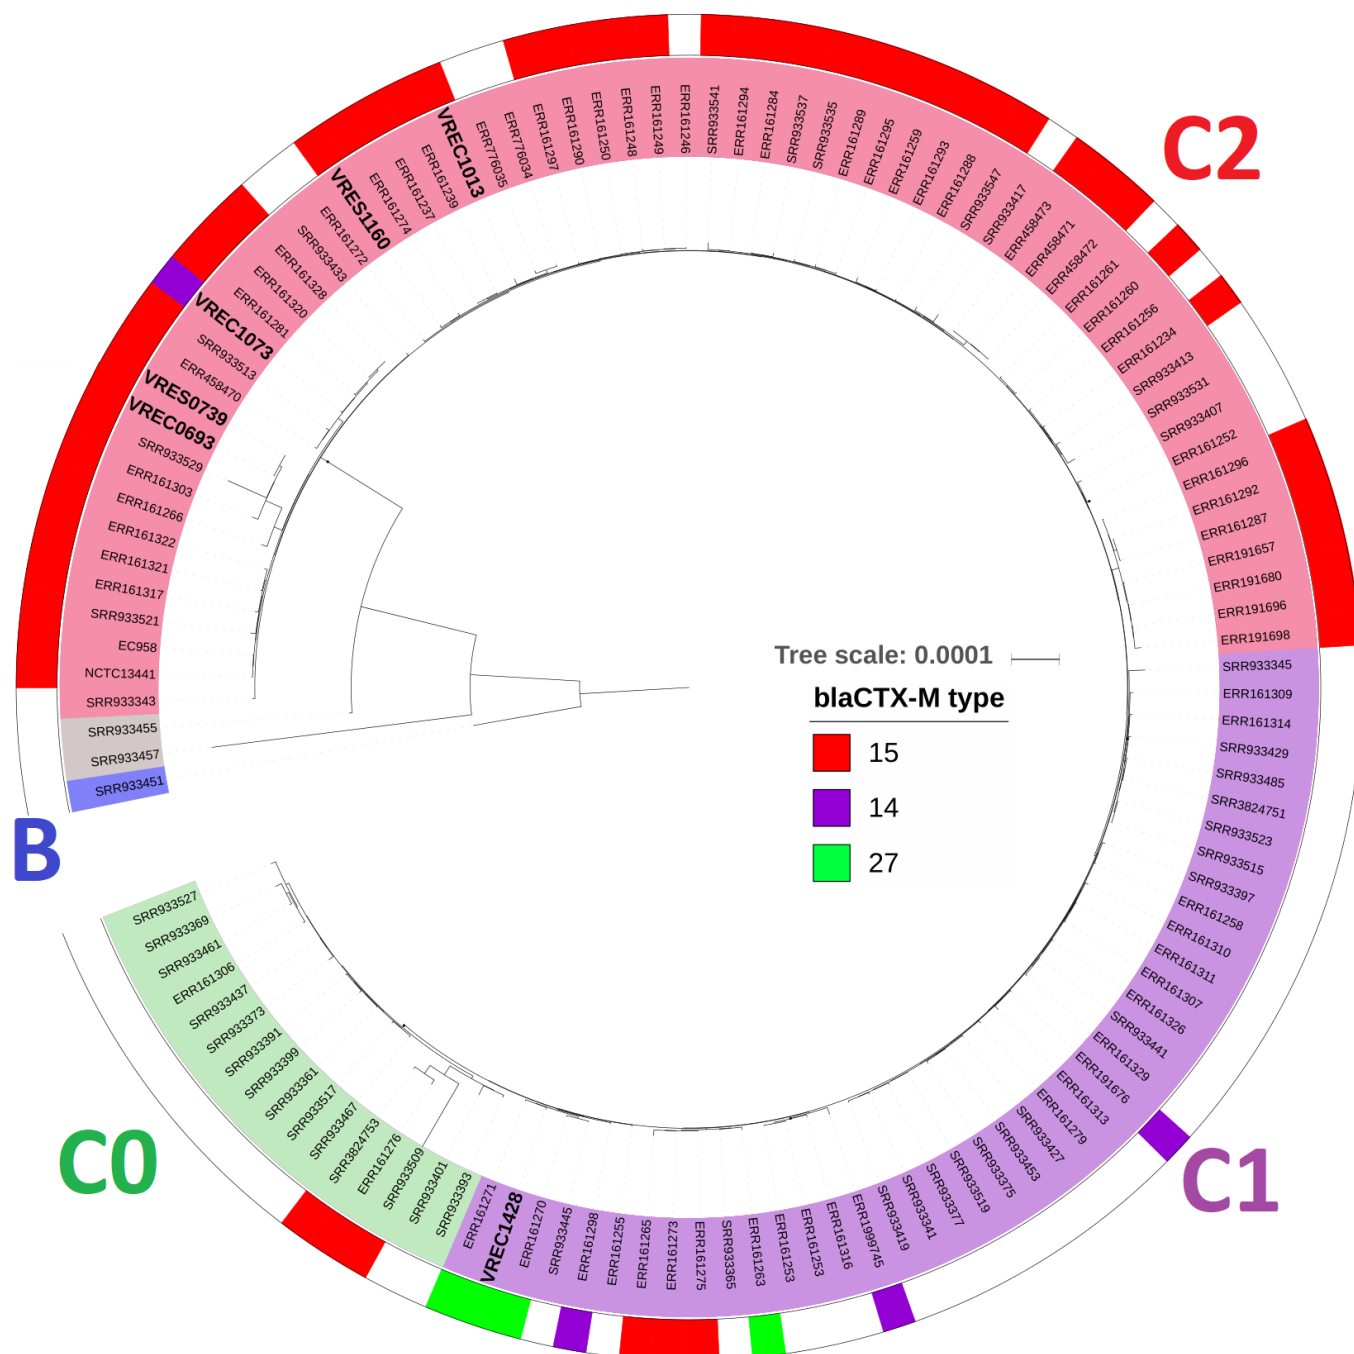

447  
 448

## 449 References

450

- 451 1. Poolman JT, Wacker M. Extraintestinal pathogenic *Escherichia coli*, a common human pathogen:  
452 challenges for vaccine development and progress in the field. *J Infect Dis*. 2016 213(1):6-13. doi:  
453 10.1093/infdis/jiv429
- 454 2. Pitout JDD, DeVinney R. *Escherichia coli* ST131: a multidrug-resistant clone primed for global  
455 domination. *F1000Research* 2017 doi: 10.12688/f1000research.10609.1
- 456 3. Goswami C, Fox S, Holden M, Connor M, Leanord A, Evans TJ. Genetic analysis of invasive  
457 *Escherichia coli* in Scotland reveals determinants of healthcare-associated versus community-  
458 acquired infections. *Microb Genom*. 2018 4(6). doi: 10.1099/mgen.0.000190.
- 459 4. Ender PT, Gajanana D, Johnston B, Clabots C, Tamarkin FJ, Johnson JR. Transmission of an  
460 extended-spectrum-beta-lactamase-producing *Escherichia coli* (sequence type ST131) strain  
461 between a father and daughter resulting in septic shock and Emphysematous pyelonephritis. *J Clin*  
462 *Microbiol*. 2009 47(11):3780-2. doi: 10.1128/JCM.01361-09.
- 463 5. Van der Bij AK, Peirano G, Pitondo-Silva A, Pitout JD. The presence of genes encoding for  
464 different virulence factors in clonally related *Escherichia coli* that produce CTX-Ms. *Diagn*  
465 *Microbiol Infect Dis*. 2012 72(4):297-302. doi: 10.1016/j.diagmicrobio.2011.12.011
- 466 6. Calhau V, Ribeiro G, Mendonça N, Da Silva GJ. Prevalent combination of virulence and  
467 plasmidic-encoded resistance in ST131 *Escherichia coli* strains. *Virulence*. 2013 4(8):726-9. doi:  
468 10.4161/viru.26552.
- 469 7. Totsika M, Beatson SA, Sarkar S, Phan MD, Petty NK, Bachmann N, Szubert M, Sidjabat HE,  
470 Paterson DL, Upton M, Schembri MA. Insights into a multidrug resistant *Escherichia coli*  
471 pathogen of the globally disseminated ST131 lineage: genome analysis and virulence mechanisms.  
472 *PLoS One*. 2011 6(10):e26578. doi: 10.1371/journal.pone.0026578.
- 473 8. Ben Zakour NL, Alsheikh-Hussain AS, Ashcroft MM, Khanh Nhu NT, Roberts LW, Stanton-  
474 Cook M, Schembri MA, Beatson SA. Sequential acquisition of virulence and fluoroquinolone  
475 resistance has shaped the evolution of *Escherichia coli* ST131. *MBio*. 2016 7(2):e00347-16. doi:  
476 10.1128/mBio.00347-16.
- 477 9. Forde BM, Phan MD, Gawthorne JA, Ashcroft MM, Stanton-Cook M, Sarkar S, Peters KM, Chan  
478 KG, Chong TM, Yin WF, Upton M, Schembri MA, Beatson SA. Lineage-specific  
479 methyltransferases define the methylome of the globally disseminated *Escherichia coli* ST131  
480 clone. *MBio*. 2015 6(6):e01602-15. doi: 10.1128/mBio.01602-15.
- 481 10. Johnson JR, Johnston B, Clabots C, Kuskowski MA, Castanheira M. *Escherichia coli* sequence  
482 type ST131 as the major cause of serious multidrug-resistant *E. coli* infections in the United  
483 States. *Clin Infect Dis*. 2010 51(3):286-94. doi: 10.1086/653932.
- 484 11. Juhas M, van der Meer JR, Gaillard M, Harding RM, Hood DW, Crook DW. Genomic islands:  
485 tools of bacterial horizontal gene transfer and evolution. *FEMS Microbiol Rev*. 2009 33(2):376-  
486 93. doi: 10.1111/j.1574-6976.2008.00136.x
- 487 12. Frost LS, Leplae R, Summers AO, Toussaint A. Mobile genetic elements: the agents of open  
488 source evolution. *Nat Rev Microbiol*. 2005 3(9):722-32.
- 489 13. Hinnebusch J, Tilly K. Linear plasmids and chromosomes in bacteria. *Mol Microbiol*. 1993  
490 10(5):917-22.
- 491 14. Woodford N, Carattoli A, Karisik E, Underwood A, Ellington MJ, Livermore DM. Complete  
492 nucleotide sequences of plasmids pEK204, pEK499, and pEK516, encoding CTX-M enzymes in  
493 three major *Escherichia coli* lineages from the United Kingdom, all belonging to the international  
494 O25:H4-ST131 clone. *Antimicrob Agents Chemother*. 2009 53(10):4472-82. doi:  
495 10.1128/AAC.00688-09.
- 496 15. Nicolas-Chanoine MH, Bertrand X, Madec JY. *Escherichia coli* ST131, an intriguing clonal  
497 group. *Clin Microbiol Rev*. 2014 27(3):543-74. doi:10.1128/CMR.00125-13.
- 498 16. Phan MD, Forde BM, Peters KM, Sarkar S, Hancock S, Stanton-Cook M, Ben Zakour NL, Upton  
499 M, Beatson SA, Schembri MA. Molecular characterization of a multidrug resistance IncF plasmid  
500 from the globally disseminated *Escherichia coli* ST131 clone. *PLoS One*. 2015 10(4):e0122369.  
501 doi: 10.1371/journal.pone.0122369.
- 502 17. Harrison E, Brockhurst MA. Plasmid-mediated horizontal gene transfer is a coevolutionary  
503 process. *Trends Microbiol*. 2012 20(6):262-7. doi: 10.1016/j.tim.2012.04.003

- 504 18. MacLean RC, San Millan A. Microbial Evolution: Towards Resolving the Plasmid Paradox. *Curr*  
505 *Biol.* 2015 25(17):R764-7. doi: 10.1016/j.cub.2015.07.006
- 506 19. Shintani M, Sanchez ZK, Kimbara K. Genomics of microbial plasmids: classification and  
507 identification based on replication and transfer systems and host taxonomy. *Front Microbiol*  
508 2015;6.
- 509 20. McNally A, Oren Y, Kelly D, Pascoe B, Dunn S, Sreecharan T, Vehkala M, Välimäki N, Prentice  
510 MB, Ashour A, Avram O, Pupko T, Dobrindt U, Literak I, Guenther S, Schaufler K, Wieler LH,  
511 Zhiyong Z, Sheppard SK, McInerney JO, Corander J. Combined Analysis of Variation in Core,  
512 Accessory and Regulatory Genome Regions Provides a Super-Resolution View into the Evolution  
513 of Bacterial Populations. *PLoS Genet.* 2016 12(9):e1006280. doi: 10.1371/journal.pgen.1006280.
- 514 21. Wick RR, Judd LM, Gorrie CL, Holt KE. Completing bacterial genome assemblies with multiplex  
515 MinION sequencing. *Microb Genom.* 2017a 3(10):e000132. doi: 10.1099/mgen.0.000132.
- 516 22. Arredondo-Alonso S, Rogers MRC, Braat JC, Verschuuren TD, Top J, Corander J, Willems RJJ,  
517 Schürch AC. mlplasmids: a user-friendly tool to predict plasmid- and chromosome-derived  
518 sequences for single species. *Microb Genom.* 2018 4(11). doi: 10.1099/mgen.0.000224.
- 519 23. Judge K, Hunt M, Reuter S, Tracey A, Quail MA, Parkhill J, Peacock SJ. Comparison of bacterial  
520 genome assembly software for MinION data and their applicability to medical microbiology.  
521 *Microb Genom.* 2016 2(9):e000085. doi: 10.1099/mgen.0.000085
- 522 24. Leggett RM, Clark MD. A world of opportunities with nanopore sequencing. *J Exp Bot.* 2017  
523 68(20):5419-5429. doi: 10.1093/jxb/erx289.
- 524 25. Roer L, Overballe-Petersen S, Hansen F, Johannesen TB, Stegger M, Bortolaia V,  
525 Leekitcharoenphon P, Korsgaard HB, Seyfarth AM, Mossong J, Wattiau P, Boland C, Hansen DS,  
526 Hasman H, Hammerum AM, Hendriksen RS. ST131 fimH22 *Escherichia coli* isolate with a  
527 blaCMY-2/IncII/ST12 plasmid obtained from a patient with bloodstream infection: highly similar  
528 to *E. coli* isolates of broiler origin. *J Antimicrob Chemother.* 2018 doi: 10.1093/jac/dky484.
- 529 26. Goldstein S, Beka L, Graf J, Klassen J. Evaluation of strategies for the assembly of diverse  
530 bacterial genomes using MinION long-read sequencing. 2018 Biorxiv doi:  
531 <https://doi.org/10.1101/362673>
- 532 27. Ludden C, Reuter S, Judge K, Gouliouris T, Blane B, Coll F, Naydenova P, Hunt M, Tracey A,  
533 Hopkins KL, Brown NM, Woodford N, Parkhill J, Peacock SJ. Sharing of carbapenemase-  
534 encoding plasmids between *Enterobacteriaceae* in UK sewage uncovered by MinION sequencing.  
535 *Microb Genom.* 2017 3(7):e000114. doi: 10.1099/mgen.0.000114.
- 536 28. Lanfear R, Schalamun M, Kainer D, Wang W, Schwessinger B. MinIONQC: fast and simple  
537 quality control for MinION sequencing data. *Bioinformatics.* 2018 doi:  
538 10.1093/bioinformatics/bty654
- 539 29. Wick RR, Judd LM, Gorrie CL, Holt KE. Unicycler: Resolving bacterial genome assemblies from  
540 short and long sequencing reads. *PLoS Comput Biol.* 2017b 13(6):e1005595. doi:  
541 10.1371/journal.pcbi.1005595.
- 542 30. Ewels P, Magnusson M, Lundin S, Käller M. MultiQC: summarize analysis results for multiple  
543 tools and samples in a single report. *Bioinformatics.* 2016 32(19):3047-8. doi:  
544 10.1093/bioinformatics/btw354.
- 545 31. George S, Pankhurst L, Hubbard A, Votintseva A, Stoesser N et al. Resolving plasmid structures  
546 in *Enterobacteriaceae* using the MinION nanopore sequencer: assessment of MinION and  
547 MinION/Illumina hybrid data assembly approaches. *Microb Genom* 2017:1–8.
- 548 32. Gurevich A, Saveliev V, Vyahhi N, Tesler G. QUAST: quality assessment tool for genome  
549 assemblies. *Bioinformatics.* 2013 29(8):1072-5. doi: 10.1093/bioinformatics/btt086.
- 550 33. Wick RR, Schultz MB, Zobel J, Holt KE. Bandage: interactive visualization of de novo genome  
551 assemblies. *Bioinformatics.* 2015 31(20):3350-2. doi: 10.1093/bioinformatics/btv383.
- 552 34. Seemann T. Prokka: rapid prokaryotic genome annotation. *Bioinformatics.* 2014 30(14):2068-9.  
553 doi: 10.1093/bioinformatics/btu153
- 554 35. Partridge SR, Tsafnat G. Automated annotation of mobile antibiotic resistance in gram-negative  
555 bacteria: The Multiple Antibiotic Resistance Annotator (MARA) and database. *J Antimicrob*  
556 *Chemother.* 2018 73(4):883-890. doi: 10.1093/jac/dkx513.
- 557 36. Carattoli A, Zankari E, García-Fernández A, Voldby Larsen M, Lund O, Villa L, Møller Aarestrup  
558 F, Hasman H. In silico detection and typing of plasmids using PlasmidFinder and plasmid

- 559 multilocus sequence typing. *Antimicrob Agents Chemother.* 2014 58(7):3895-903. doi:  
560 10.1128/AAC.02412-14.
- 561 37. Sullivan MJ, Petty NK, Beatson SA. Easyfig: a genome comparison visualizer. *Bioinformatics.*  
562 2011 27(7):1009-10. doi: 10.1093/bioinformatics/btr039
- 563 38. Matsumura Y, Pitout JDD, Peirano G, DeVinney R, Noguchi T, Yamamoto M, Gomi R, Matsuda  
564 T, Nakano S, Nagao M, Tanaka M, Ichiyama S. Rapid identification of different *Escherichia coli*  
565 sequence type 131 clades. *Antimicrob Agents Chemother.* 2017 ;61(8). pii: e00179-17. doi:  
566 10.1128/AAC.00179-17.
- 567 39. Chen S, Zhou Y, Chen Y, Gu J. Fastp: an ultra-fast all-in-one FASTQ preprocessor.  
568 *Bioinformatics.* 2018 34(17):i884–i890.
- 569 40. Page AJ, Cummins CA, Hunt M, Wong VK, Reuter S, Holden MT, Fookes M, Falush D, Keane  
570 JA, Parkhill J. Roary: rapid large-scale prokaryote pan genome analysis. *Bioinformatics.* 2015  
571 31(22):3691-3. doi: 10.1093/bioinformatics/btv421
- 572 41. Katoh K, Standley DM. MAFFT multiple sequence alignment software version 7: improvements  
573 in performance and usability. *Mol Biol Evol.* 2013 30(4):772-80. doi: 10.1093/molbev/mst010
- 574 42. Stamatakis A. RAxML version 8: a tool for phylogenetic analysis and post-analysis of large  
575 phylogenies. *Bioinformatics.* 2014 30(9):1312-3. doi: 10.1093/bioinformatics/btu033
- 576 43. Partridge SR, Kwong SM, Firth N, Jensen SO. Mobile genetic elements associated with  
577 antimicrobial resistance. *Clinical Microbiology Reviews* 31(4):e00088-17 2018 doi:  
578 10.1128/CMR.00088-17
- 579 44. Lartigue MF, Poirel L, Aubert D, Nordmann P. In vitro analysis of ISE*cp1B*-mediated  
580 mobilization of naturally occurring beta-lactamase gene blaCTX-M of *Kluyvera ascorbata*.  
581 *Antimicrob Agents Chemother.* 2006 50(4):1282-6.
- 582 45. Barlow M, Reik RA, Jacobs SD, Medina M, Meyer MP, McGowan JE Jr, Tenover FC. High rate  
583 of mobilization for blaCTX-Ms. *Emerg Infect Dis.* 2008 14(3):423-8. doi:  
584 10.3201/eid1403.070405.
- 585 46. Petty NK, Ben Zakour NL, Stanton-Cook M, Skippington E, Totsika M, Forde BM, Phan MD,  
586 Gomes Moriel D, Peters KM, Davies M, Rogers BA, Dougan G, Rodriguez-Baño J, Pascual A,  
587 Pitout JD, Upton M, Paterson DL, Walsh TR, Schembri MA, Beatson SA. Global dissemination of  
588 a multidrug resistant *Escherichia coli* clone. *Proc Natl Acad Sci U S A.* 2014 111(15):5694-9. doi:  
589 10.1073/pnas.1322678111
- 590 47. Lemon JK, Khil PP, Frank KM, Dekker JP. Rapid Nanopore Sequencing of Plasmids and  
591 Resistance Gene Detection in Clinical Isolates. *J Clin Microbiol.* 2017 55(12):3530-3543. doi:  
592 10.1128/JCM.01069-17.
- 593 48. Stoesser N, Batty EM, Eyre DW, Morgan M, Wyllie DH, Del Ojo Elias C, Johnson JR, Walker  
594 AS, Peto TEA, Crook DW. Predicting antimicrobial susceptibilities for *Escherichia coli* and  
595 *Klebsiella pneumoniae* isolates using whole genomic sequence data. *J Antimicrob Chemother*  
596 2013 68:2234-2244.
- 597 49. Branger C, Ledda A, Billard-Pomares T, Doublet B, Fouteau S, Barbe V, Roche D, Cruveiller S,  
598 Médigue C, Castellanos M, Decré D, Drieux-Rouze L, Clermont O, Glodt J, Tenaillon O,  
599 Cloeckaert A, Arlet G, Denamur E. Extended-spectrum  $\beta$ -lactamase-encoding genes are spreading  
600 on a wide range of *Escherichia coli* plasmids existing prior to the use of third-generation  
601 cephalosporins. *Microb Genom.* 2018 4(9). doi: 10.1099/mgen.0.000203.
- 602 50. Moradigaravand D, Palm M, Farewell A, Mustonen V, Warringer J, Parts L. Prediction of  
603 antibiotic resistance in *Escherichia coli* from large-scale pan-genome data. 2018 PLoS  
604 Computational Biology doi: <https://doi.org/10.1371/journal.pcbi.1006258>.
- 605 51. Greig DR, Dallman TJ, Hopkins KL, Jenkins C. MinION nanopore sequencing identifies the  
606 position and structure of bacterial antibiotic resistance determinants in a multidrug-resistant strain  
607 of enteroaggregative *Escherichia coli*. *Microb Genom.* 2018 4(10). doi: 10.1099/mgen.0.000213.
- 608 52. Wang Y, Yang Q, Wang Z. The evolution of nanopore sequencing. *Front Genet* 2014 5:449.
- 609 53. Tamma PD, Y Fan, Bergman Y, Perteza G, Kazmi A, Lewis S, Carroll KC, Schatz MC, Timp W,  
610 Simner P. Rapid optimization of antibiotic therapy for multidrug-resistant gram-negative  
611 infections using Nanopore whole genome sequencing. 2018 Available at SSRN:  
612 <https://ssrn.com/abstract=3219539>.

- 613 54. Tyson GH, McDermott PF, Li C, Chen Y, Tadesse DA, Mukherjee S, Bodeis -Jones S, Kabera C,  
614 Gaines SA, Loneragan GH, Edrington TS, Torrence M, Harhay DM, Zhao S. WGS accurately  
615 predicts antimicrobial resistance in *Escherichia coli*. J Antimicrob Chemother 2015 70:2763-2769.  
616 55. Su M, Satola SW, Read TD. Genome-based prediction of bacterial antibiotic resistance. J Clin  
617 Microbiol. 2018 doi: 10.1128/JCM.01405-18.

Strain, subclade,  
contig size (bp) &  
*bla*<sub>CTX-M</sub> gene location

Annotated genetic structure of contig with *bla*<sub>CTX-M</sub> genes

VRES1160 (C2)  
61,934  
*bla*<sub>CTX-M-15</sub> + plasmid

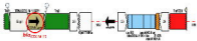

VREC1013 (C2)  
89,945  
*bla*<sub>CTX-M-15</sub> + plasmid

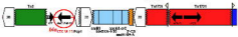

VREC1428 (C1)  
92,750  
*bla*<sub>CTX-M-15</sub> + plasmid

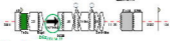

VREC0693 (C2)  
5,039,909  
*bla*<sub>CTX-M-15</sub> + chromosome

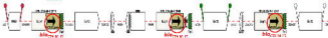

VREC1073 (C2)  
96,056  
*bla*<sub>CTX-M-15</sub> + chromosome

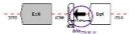



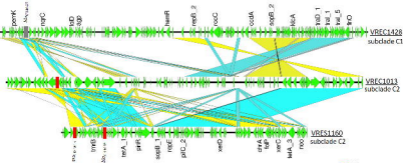

| Strain   | Size (bp) | Plasmid type | Gene count |
|----------|-----------|--------------|------------|
| VRES1160 | 61934     | IncFIA       | 91         |
| VREC1013 | 89945     | IncFII       | 220        |
| VREC1428 | 92750     | IncFIA       | 143        |

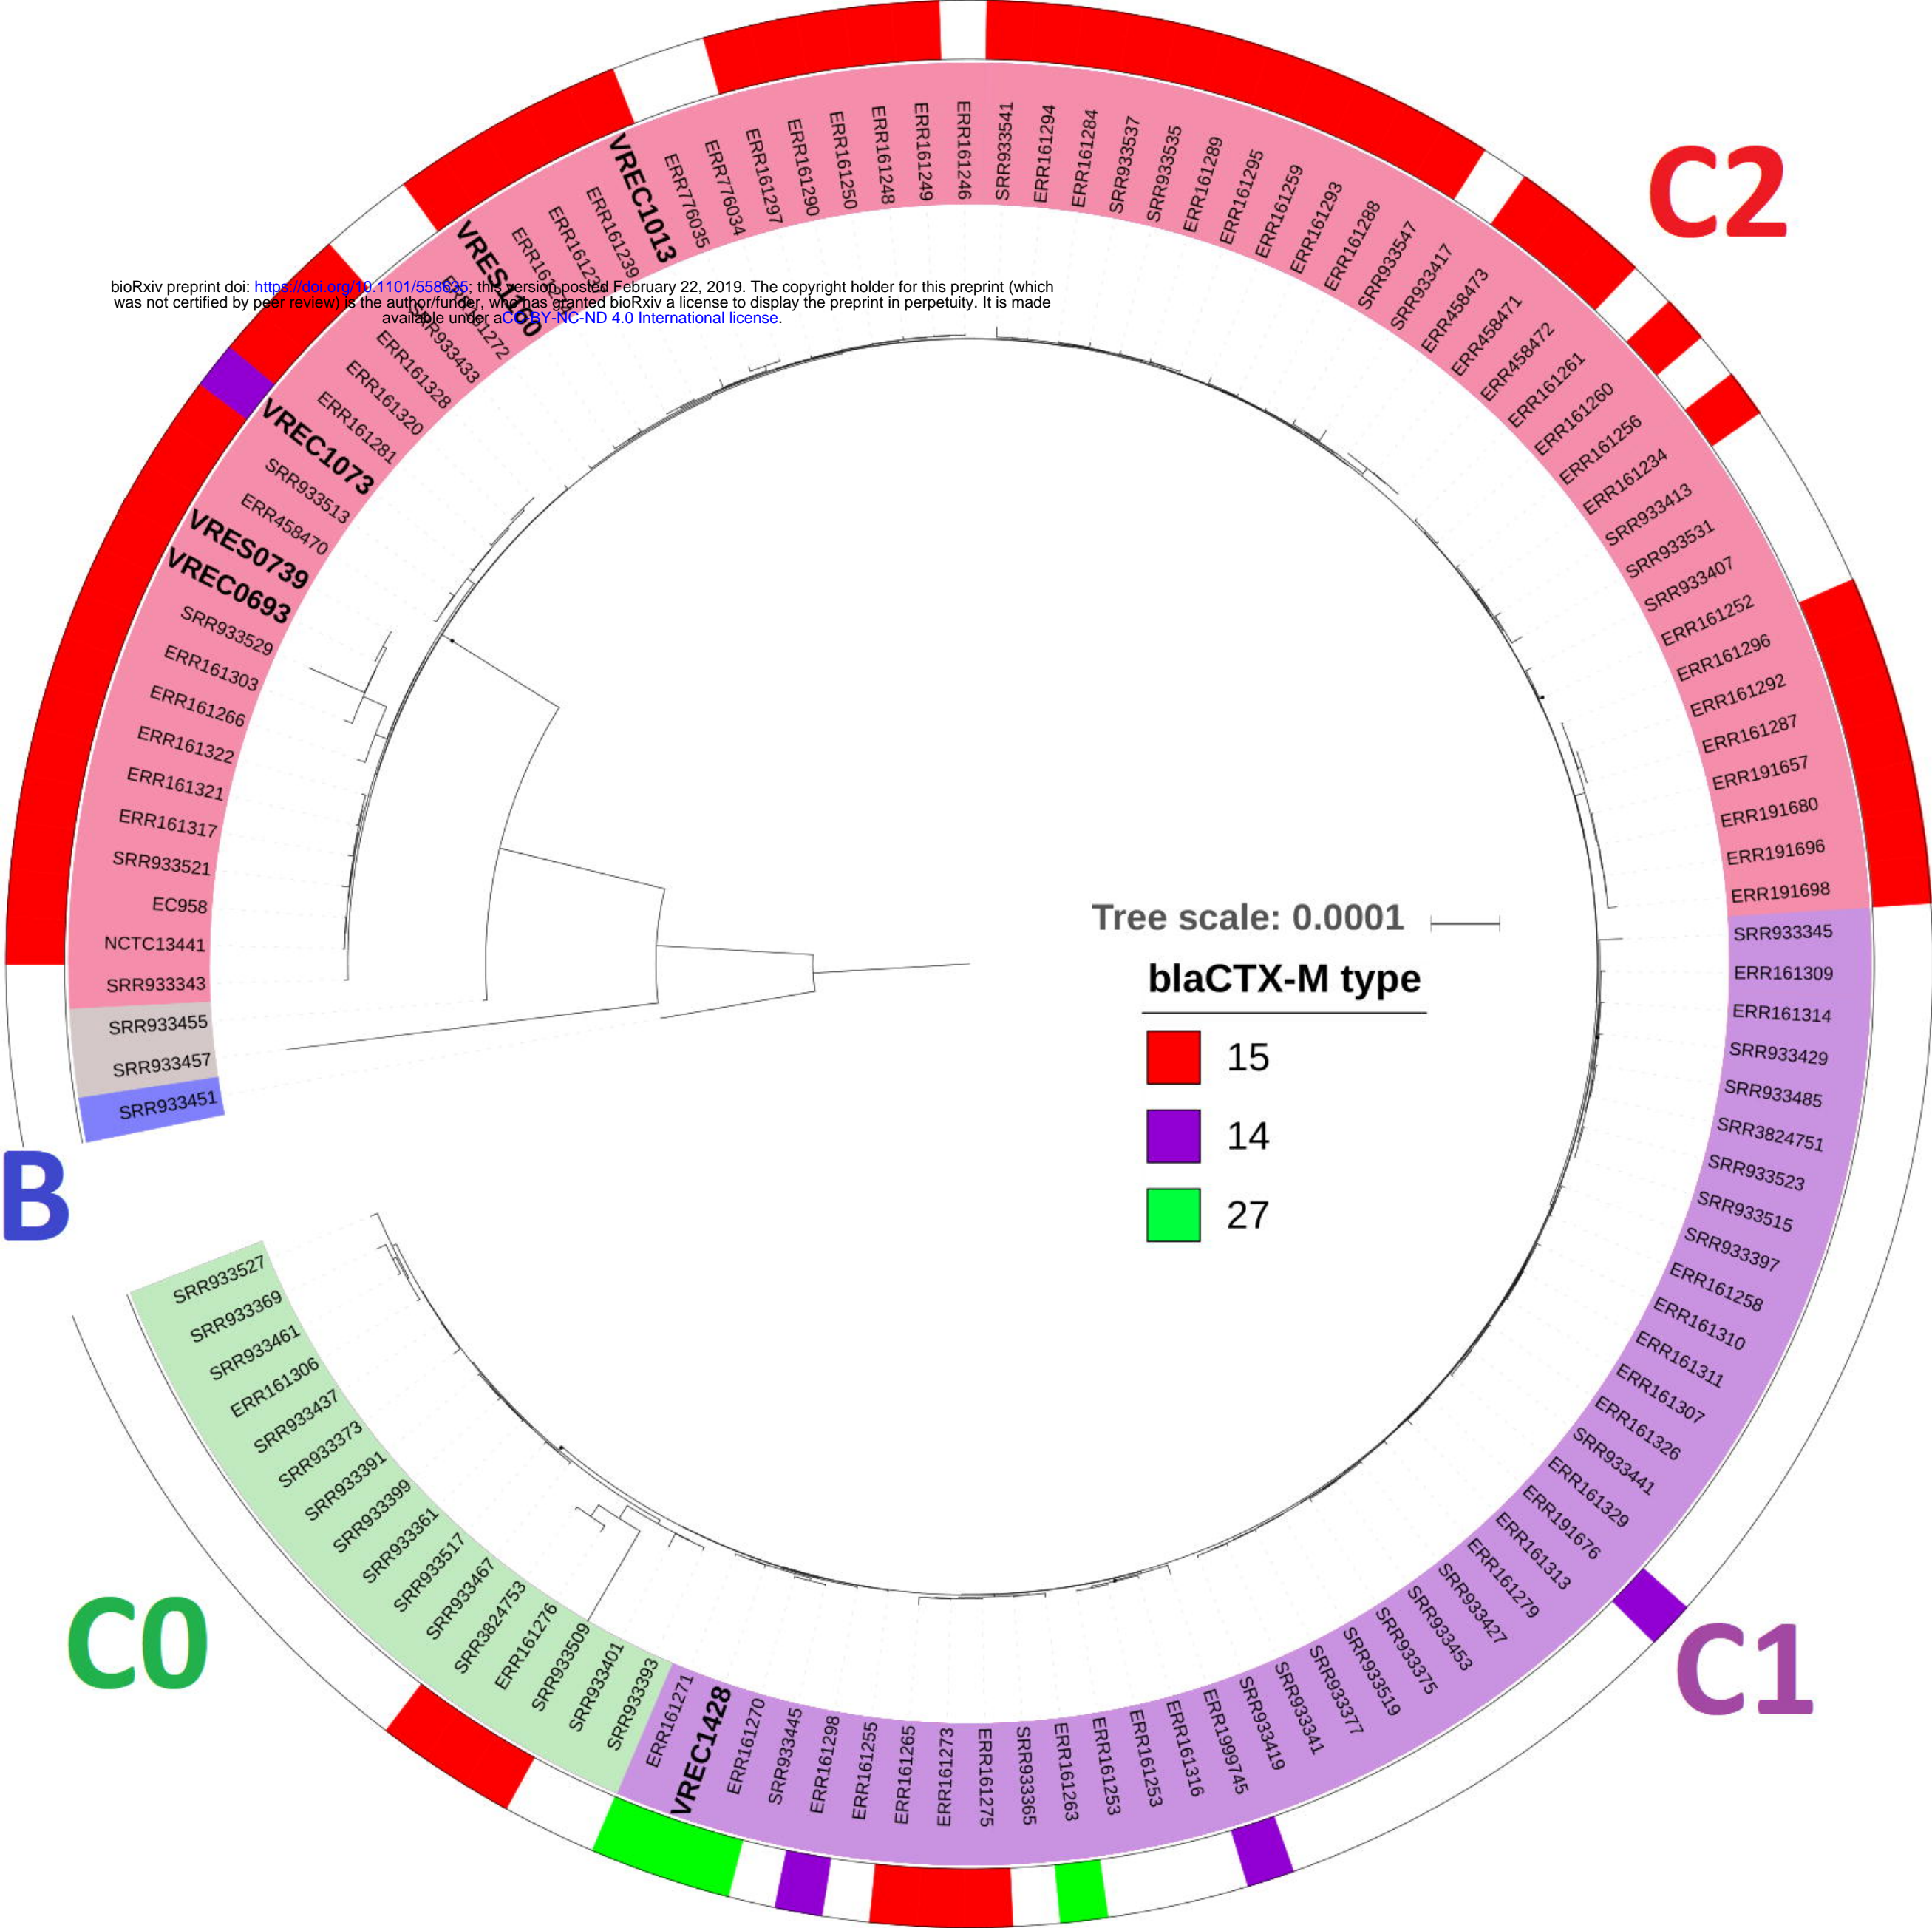

Source: https://www.biorxiv.org/content/10.1101/558635v1.full.pdf
